# Supplementary material for: SGLT2 inhibition slows tumor growth in mice by reversing hyperinsulinemia
Source: PubMed Central journal article supplement (PMC6907191; doi:10.1186/s40170-019-0203-1), 2019-12-11
Supplement: 40170_2019_203_MOESM1_ESM.pdf [file 40170_2019_203_MOESM1_ESM.pdf]

# Figure S1

## E0771

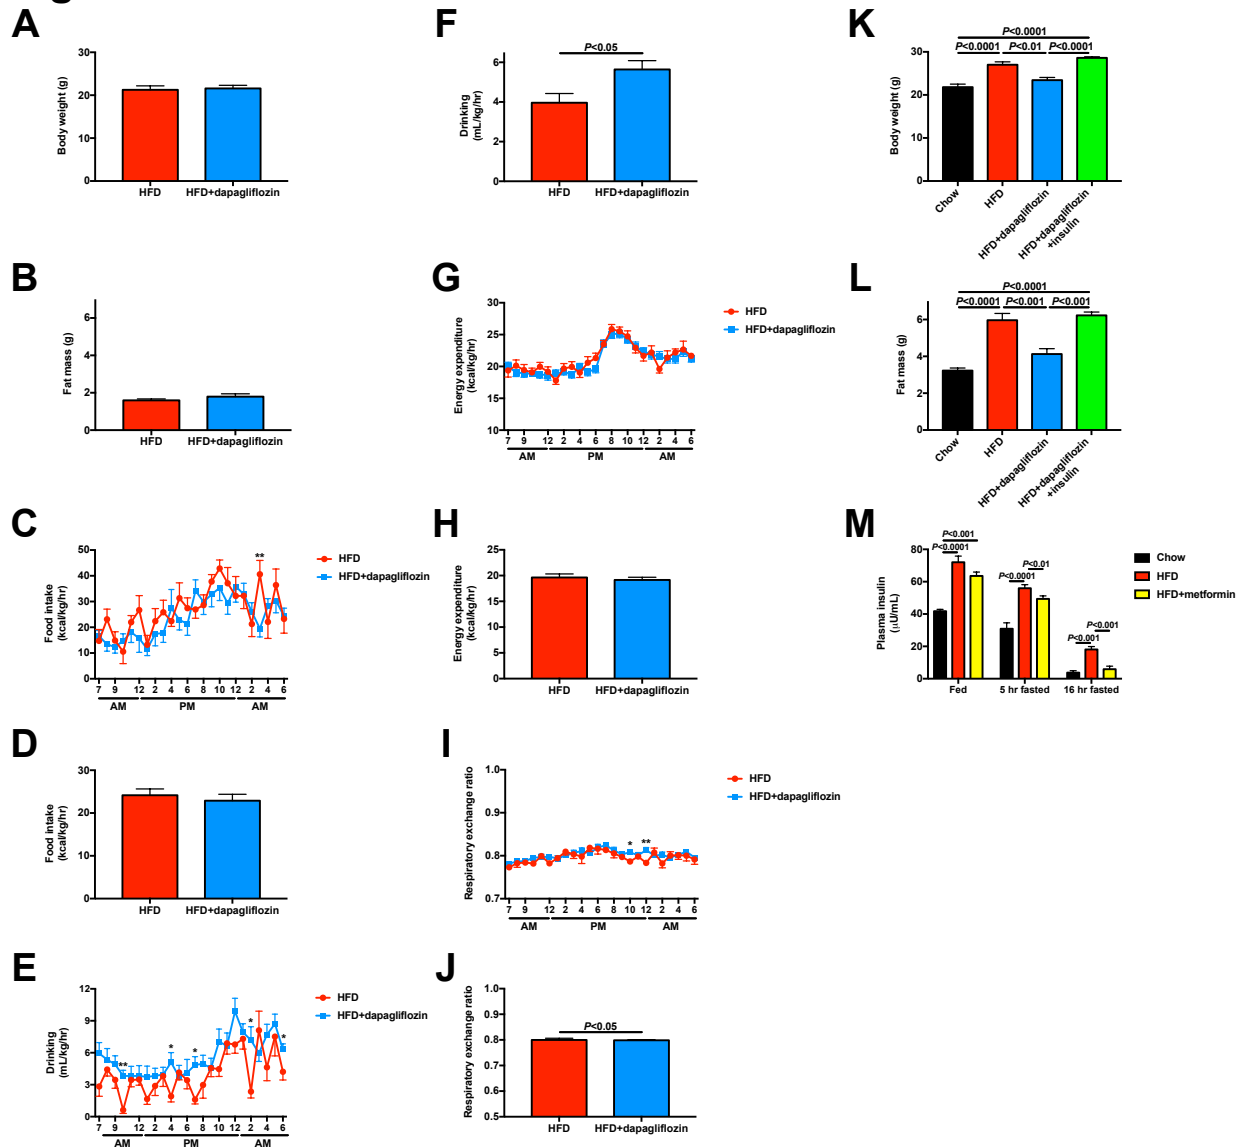

**Figure S1. Dapagliflozin slows E0771 breast tumor growth in an insulin-dependent manner.** (A)-(B) Body weight and fat mass one week after tumor implantation. (C) Food intake timecourse. In panels (A)-(J), \* $P < 0.05$ , \*\* $P < 0.01$ , \*\*\* $P < 0.001$ , \*\*\*\* $P < 0.0001$  by the 2-tailed unpaired Student's t-test. (D) Daily food intake. (E)-(F) Water drinking timecourse and daily water drinking. (G)-(H) Energy expenditure timecourse and daily energy expenditure. (I)-(J) Respiratory exchange ratio timecourse and daily respiratory exchange ratio. (K)-(L) Body weight and fat mass four weeks after tumor implantation and initiation of HFD±dapagliflozin. Groups in panels (K)-(M) were compared by ANOVA with Bonferroni's multiple comparisons test. (M) Plasma insulin concentrations in tumor-bearing mice treated chronically with metformin in drinking water. All data are the mean±S.E.M. of  $n=5-12$  per group.

# Figure S2

# E0771

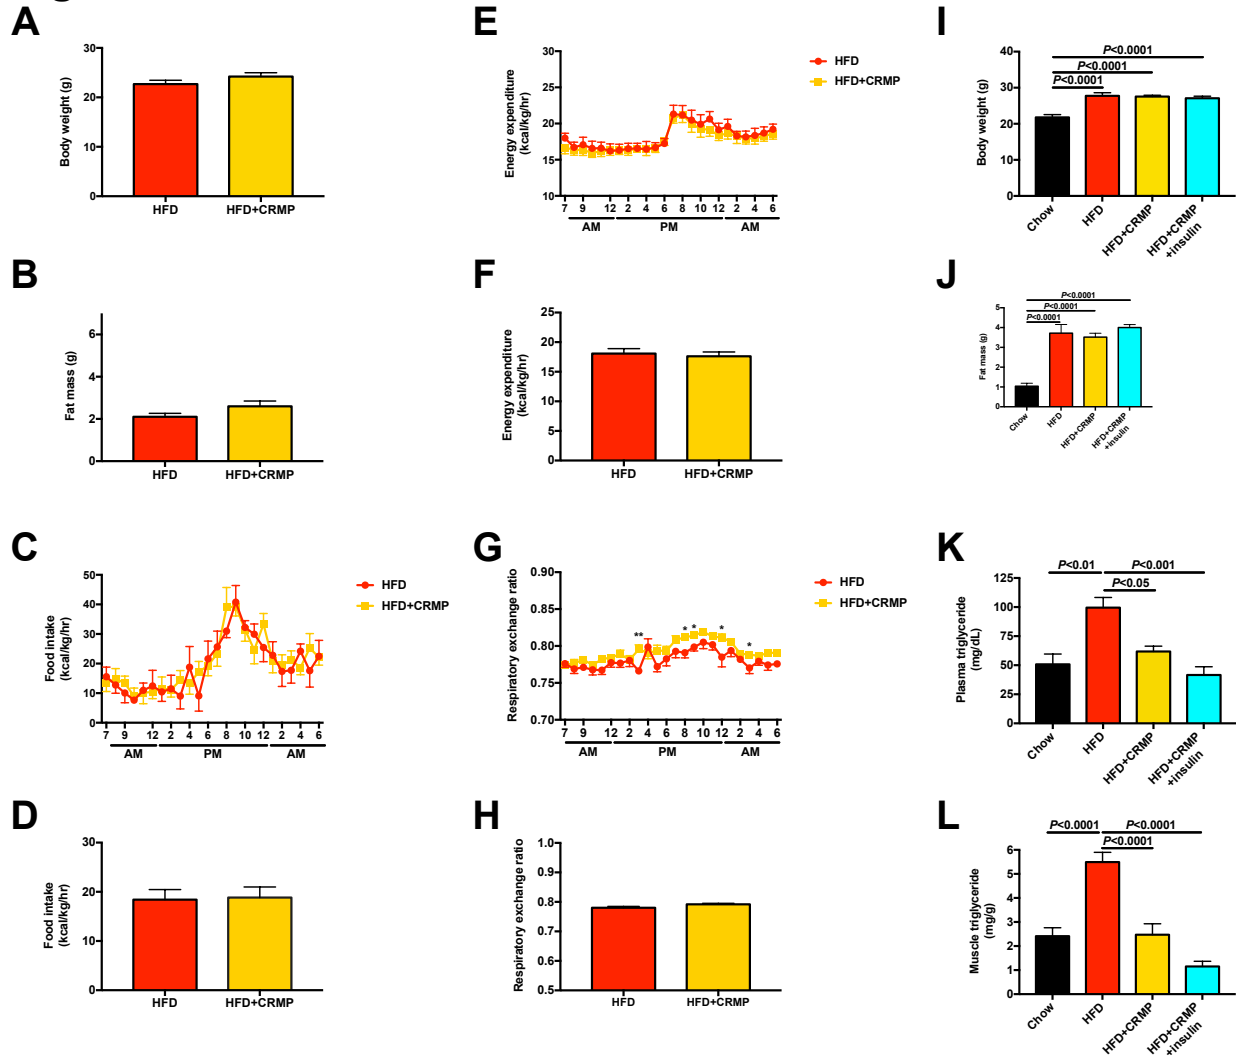

**Figure S2. A controlled-release mitochondrial protonophore slows E0771 breast tumor growth in an insulin-dependent manner.** (A)-(B) Body weight and fat mass one week after tumor implantation. (C) Food intake timecourse. In panels (A)-(H), \* $P < 0.05$ , \*\* $P < 0.01$  by the 2-tailed unpaired Student's t-test. (D) Daily food intake. (E)-(F) Energy expenditure timecourse and daily energy expenditure. (G)-(H) Respiratory exchange ratio timecourse and daily respiratory exchange ratio. (I)-(J) Body weight and fat mass four weeks after tumor implantation and initiation of HFD $\pm$ CRMP $\pm$ insulin. Groups in panels (I)-(L) were compared by ANOVA with Bonferroni's multiple comparisons test. (K)-(L) Plasma and gastrocnemius triglyceride concentrations. All data are the mean $\pm$ S.E.M. of  $n = 5-11$  per group.

# Figure S3

# MC38

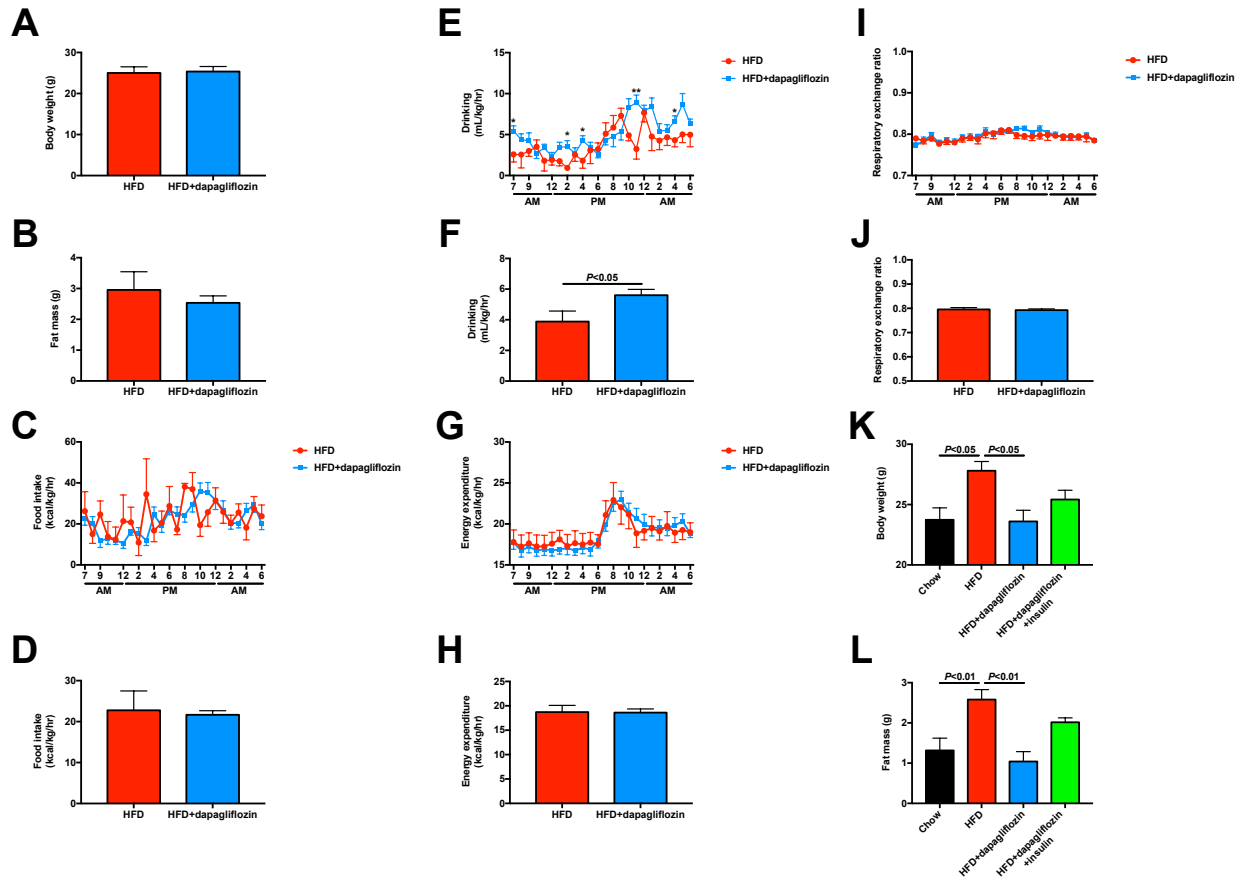

**Figure S3. Dapagliflozin slows MC38 colon tumor growth in an insulin-dependent manner.** (A)-(B) Body weight and fat mass one week after tumor implantation. (C) Food intake timecourse. In panels (A)-(J), \* $P < 0.05$ , \*\* $P < 0.01$ , \*\*\* $P < 0.001$ , \*\*\*\* $P < 0.0001$  by the 2-tailed unpaired Student's t-test. (D) Daily food intake. (E)-(F) Water drinking timecourse and daily water drinking. (G)-(H) Energy expenditure timecourse and daily energy expenditure. (I)-(J) Respiratory exchange ratio timecourse and daily respiratory exchange ratio. (K)-(L) Body weight and fat mass four weeks after tumor implantation and initiation of HFD±dapagliflozin. Groups in panels (K)-(L) were compared by ANOVA with Bonferroni's multiple comparisons test. All data are the mean±S.E.M. of  $n=5-12$  per group.

## Figure S4

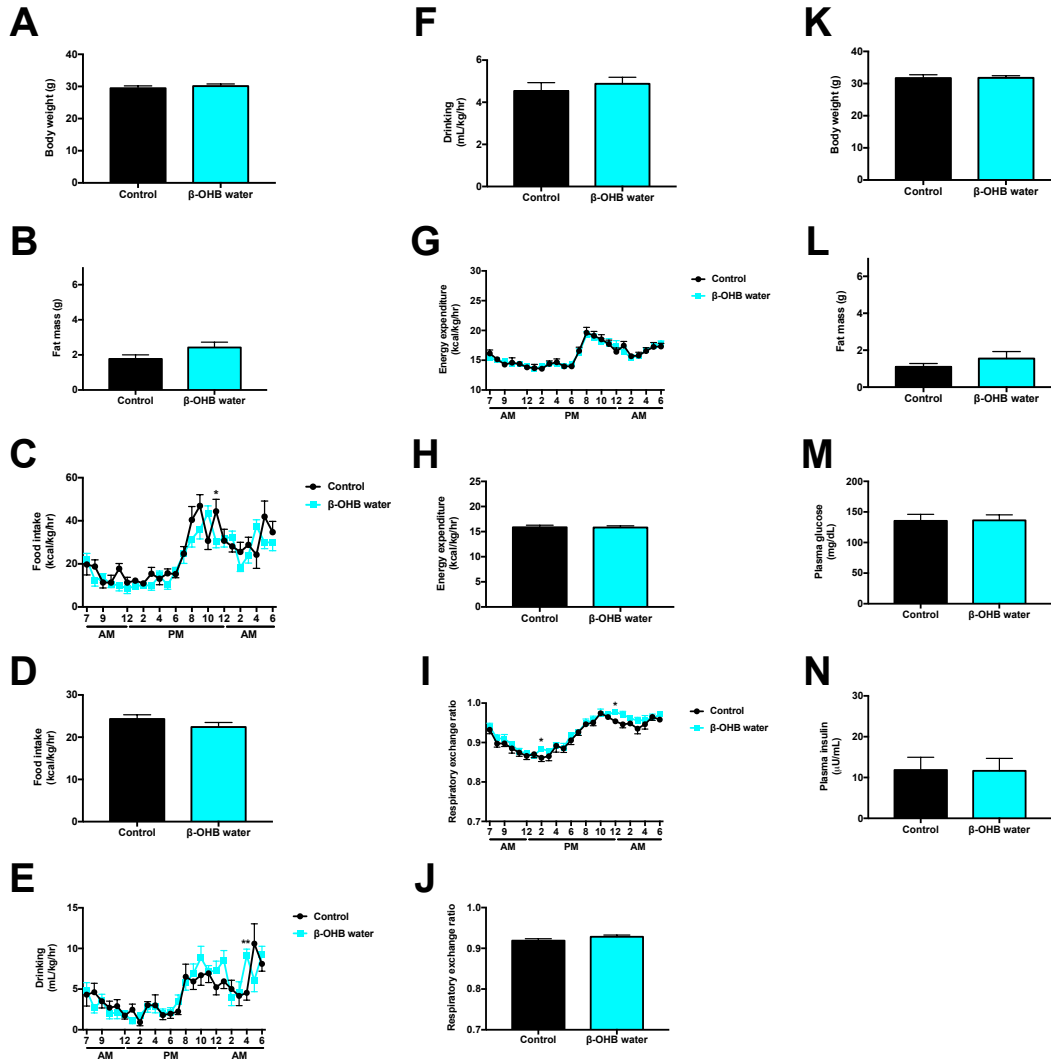

**Figure S4. Ketone supplementation in drinking water does not independently alter MC38 colon tumor growth.** (A)-(B) Body weight and fat mass one week after tumor implantation. (C) Food intake timecourse. In all panels, \* $P$ <0.05, \*\* $P$ <0.01. (D) Daily food intake. (E)-(F) Water drinking timecourse and daily water drinking. (G)-(H) Energy expenditure timecourse and daily energy expenditure. (I)-(J) Respiratory exchange ratio timecourse and daily respiratory exchange ratio. (K)-(L) Body weight and fat mass three weeks after tumor implantation and initiation of  $\beta$ -OHB in drinking water. (M)-(N) Plasma glucose and insulin after three weeks of chronic  $\beta$ -OHB supplementation. All data are the mean  $\pm$  S.E.M. of  $n=7-8$  per group, with groups compared by the 2-tailed unpaired Student's  $t$ -test.

# Figure S5

# MC38

## A

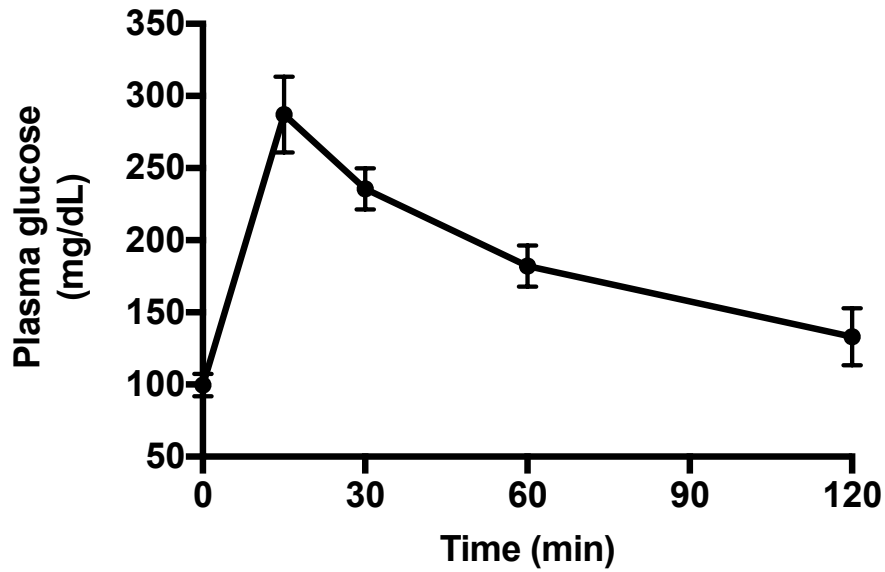

## B

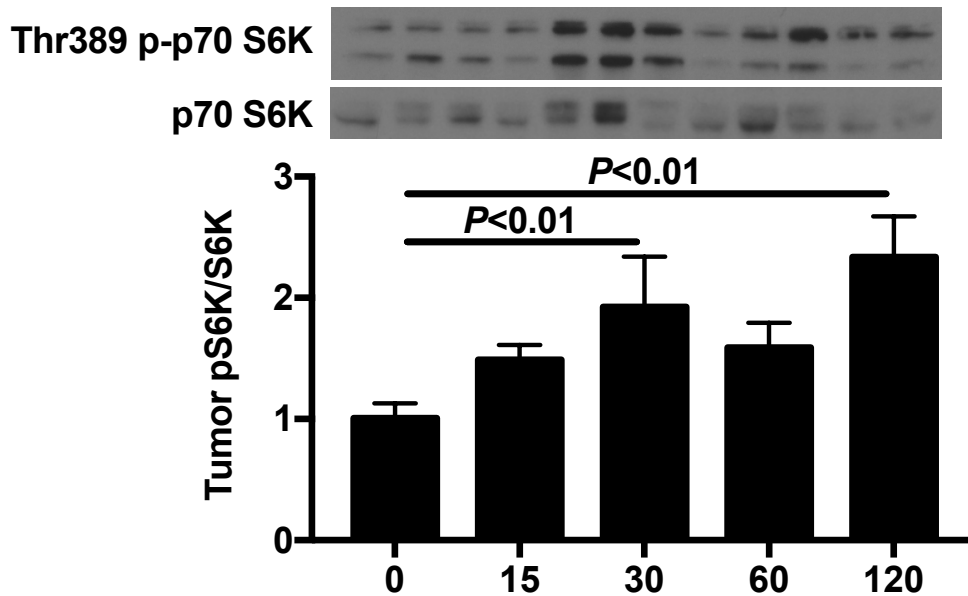

**Figure S5. Insulin signaling is dynamically activated under postprandial conditions in MC38 tumors.** (A) Plasma glucose. (B) Tumor pS70 S6K pThr389. Both bands of the doublets shown were quantified. Data are the mean  $\pm$  S.E.M. of  $n=4-10$  per time point, with comparisons by ANOVA with Bonferroni's multiple comparisons test, comparing each group to time zero.
